# Supplementary material for: Decoding Vagus-Nerve Activity with Carbon Nanotube Sensors in Freely Moving Rodents
Source: MDPI journal article supplement (doi:10.3390/bios12020114), 2022-02-11
Supplement: s1 [file s1]

Supplementary Information

# Title

## Decoding Vagus-Nerve Activity with Carbon Nanotube Sensors in Freely Moving Rodents

Joseph T. Marmarstein, Grant A. McCallum and Dominique M. Durand \*

Neural Engineering Center, Biomedical Engineering, Case Western Reserve University, Cleveland, OH 44106, USA; jtm124@case.edu (J.T.M.); gam19@case.edu (G.A.M.)

\* Correspondence: dxd6@case.edu

**Citation:** Marmarstein, J.T.; McCallum, G.A.; Durand, D.M. Decoding Vagus-Nerve Activity with Carbon Nanotube Sensors in Freely Moving Rodents. *Biosensors* **2022**, *12*, 114. <https://doi.org/10.3390/bios12020114>

Received: 8 January 2022

Accepted: 5 February 2022

Published: 11 February 2022

**Publisher's Note:** MDPI stays neutral with regard to jurisdictional claims in published maps and institutional affiliations.

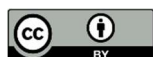

**Copyright:** © 2022 by the authors. Submitted for possible open access publication under the terms and conditions of the Creative Commons Attribution (CC BY) license (<https://creativecommons.org/licenses/by/4.0/>).

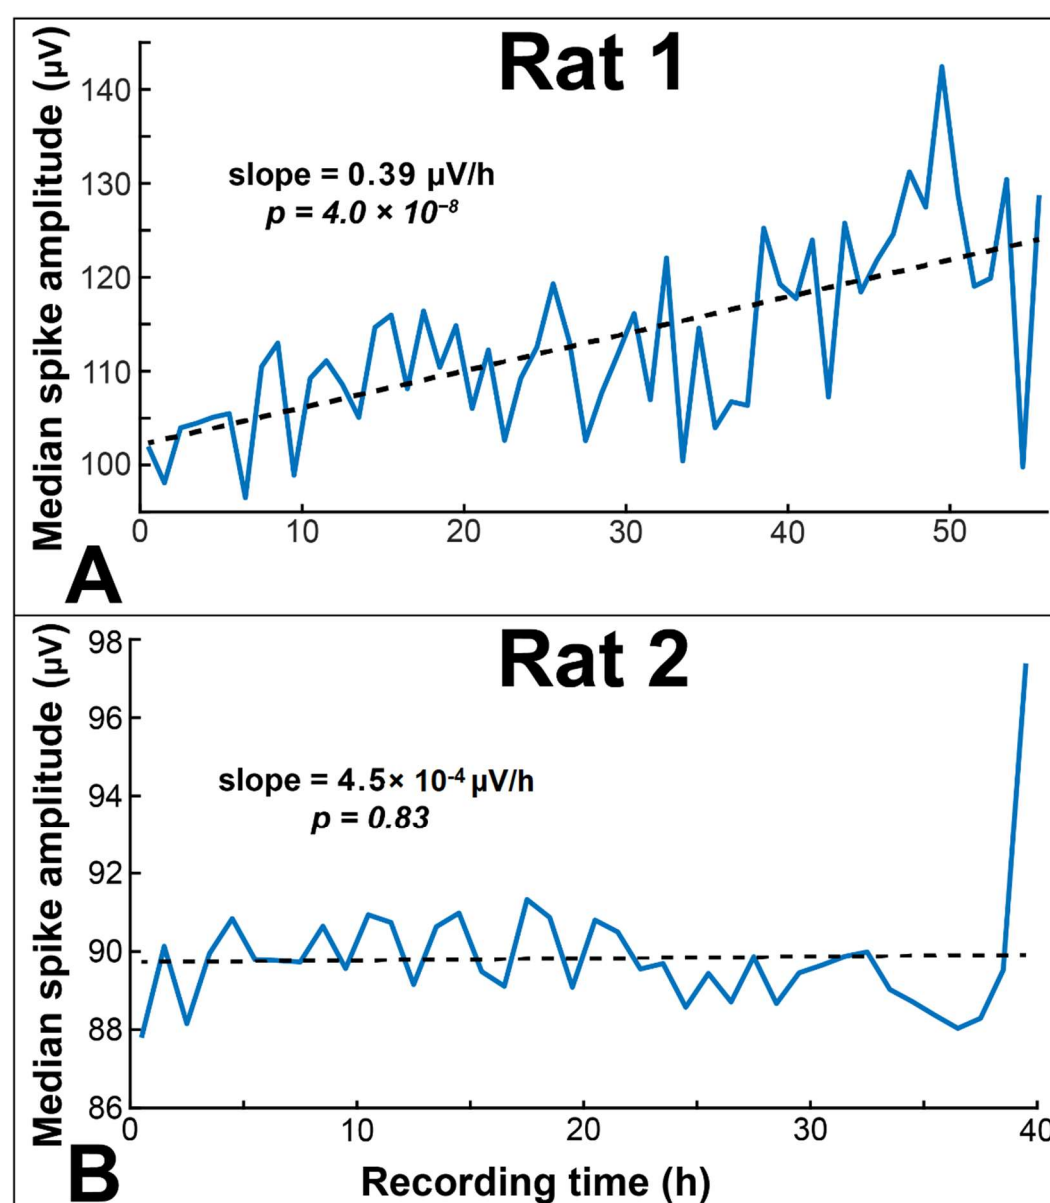

**Supplementary Figure S1.** Median spike amplitude over time.  $\times 10^{-4} \mu\text{V/h}$  (A). Median spike amplitude for spikes recorded in Rat 1 slightly increase over the recording time, with a statistically

significant slope of  $0.39\mu\text{V}$  per hour. (B). Median spike amplitude of spikes recorded in Rat 2 did not change over the recording time.

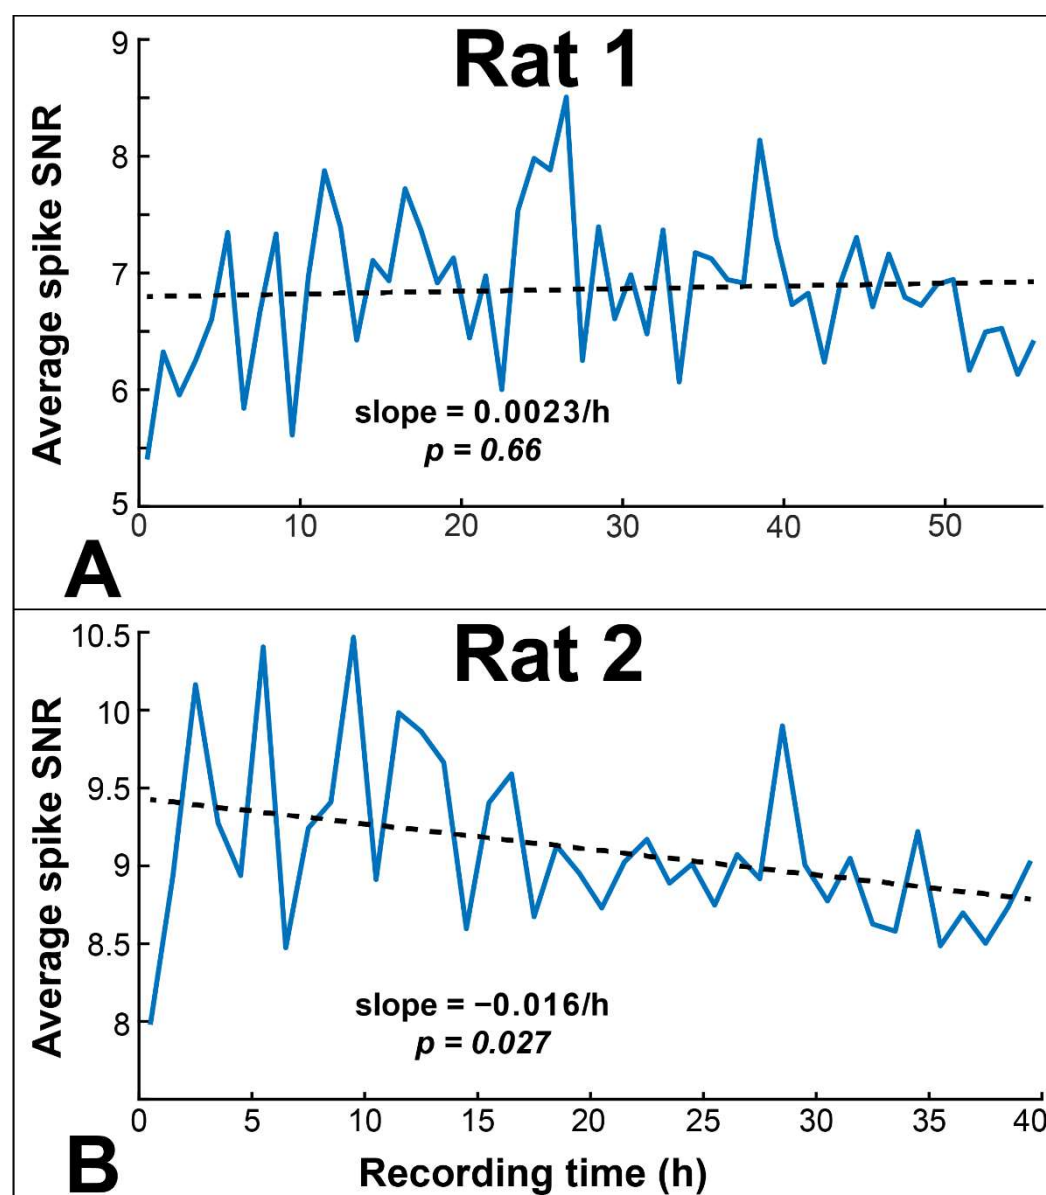

**Supplementary Figure S2.** Average spike SNR (spike RMS divided by noise RMS) over time. (A). SNR of spikes recorded in Rat 1 did not change over the recording time. (B). SNR of spikes recorded in Rat 2 did not change over the recording time.

**Supplementary Table S1.** Differences in ISI distributions for before, during, and after eating periods, compared to non-eating periods, for all clusters which had at least one group with a significant change. Cluster groups are shown for each cluster (see Table 1), and non-significant p-values are not shown.

| Cluster Number | Cluster Group | Before Eating         | During Eating        | After Eating          |
|----------------|---------------|-----------------------|----------------------|-----------------------|
| 1.8            | II            | $9.4 \times 10^{-45}$ | NS                   | $1.4 \times 10^{-27}$ |
| 1.14           | II            | $3.2 \times 10^{-10}$ | $2.1 \times 10^{-5}$ | $7.3 \times 10^{-7}$  |
| 1.18           | II            | $6.9 \times 10^{-13}$ | NS                   | NS                    |
| 1.20           | II            | $5.7 \times 10^{-11}$ | NS                   | NS                    |
| 1.21           | II            | $9.9 \times 10^{-11}$ | NS                   | NS                    |

|      |    |                       |                       |                       |
|------|----|-----------------------|-----------------------|-----------------------|
| 1.28 | II | $1.9 \times 10^{-9}$  | NS                    | NS                    |
| 1.29 | II | $4.4 \times 10^{-9}$  | NS                    | NS                    |
| 1.30 | IV | $2.5 \times 10^{-6}$  | NS                    | NS                    |
| 1.52 | IV | $4.0 \times 10^{-10}$ | NS                    | NS                    |
| 1.56 | IV | $6.4 \times 10^{-13}$ | $8.2 \times 10^{-9}$  | $1.4 \times 10^{-11}$ |
| 2.10 | IV | NS                    | $3.6 \times 10^{-11}$ | NS                    |
| 2.11 | IV | NS                    | $4.9 \times 10^{-8}$  | NS                    |
| 2.12 | IV | NS                    | $2.4 \times 10^{-8}$  | NS                    |
| 2.13 | IV | NS                    | $5.1 \times 10^{-7}$  | NS                    |
| 2.16 | IV | NS                    | $6.3 \times 10^{-6}$  | NS                    |
| 2.18 | IV | NS                    | $9.6 \times 10^{-10}$ | NS                    |
| 2.21 | IV | NS                    | $8.8 \times 10^{-9}$  | NS                    |
| 2.24 | IV | NS                    | $3.9 \times 10^{-6}$  | NS                    |
| 2.30 | IV | NS                    | $3.1 \times 10^{-6}$  | NS                    |
| 2.31 | IV | NS                    | $1.0 \times 10^{-5}$  | NS                    |
| 2.33 | IV | NS                    | $7.7 \times 10^{-12}$ | NS                    |
| 2.34 | IV | NS                    | $5.5 \times 10^{-7}$  | NS                    |
| 2.37 | IV | NS                    | $2.3 \times 10^{-10}$ | NS                    |
| 2.40 | IV | NS                    | $2.8 \times 10^{-10}$ | NS                    |
| 2.42 | IV | NS                    | $2.0 \times 10^{-5}$  | NS                    |
| 2.43 | IV | NS                    | $8.2 \times 10^{-6}$  | NS                    |
| 2.58 | IV | NS                    | $1.7 \times 10^{-5}$  | NS                    |
| 2.73 | IV | NS                    | $2.6 \times 10^{-6}$  | NS                    |

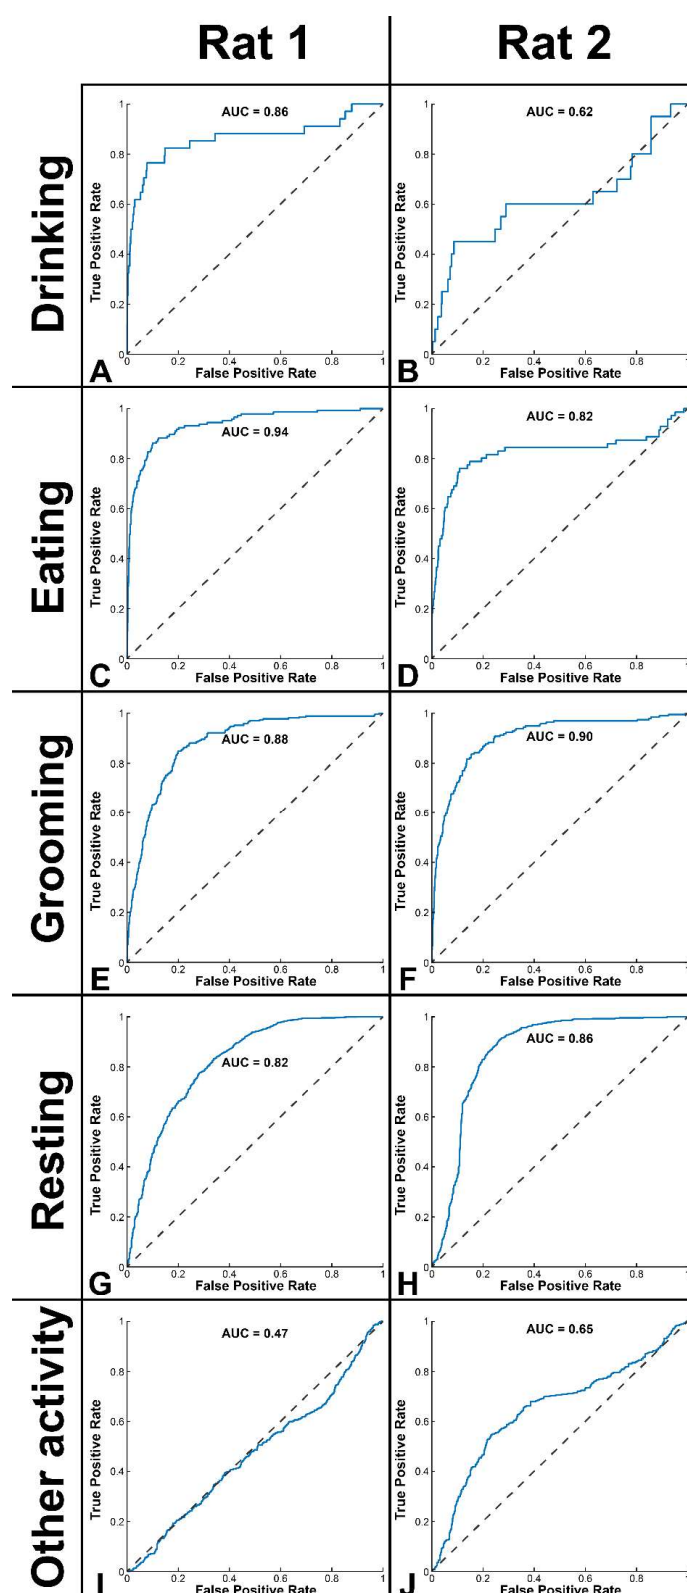

**Supplementary Figure S3.** Receiver operating characteristic (ROC) curves and area-under-the-curve (AUC) values to assess performance of a multinomial logistic regression model to classify animal behaviors based on spike cluster firing rates. Dotted lines show the expected ROC curve for a random classifier. (A). ROC curve for classifying drinking in Rat 1, with AUC = 0.86. (B). ROC curve for classifying drinking in Rat 2, with AUC = 0.62. (C). ROC curve for classifying eating in Rat 1, with AUC = 0.94. (D).

ROC curve for classifying eating in Rat 2, with AUC = 0.82. **(E)**. ROC curve for classifying grooming in Rat 1, with AUC = 0.88. **(F)**. ROC curve for classifying grooming in Rat 2, with AUC = 0.90. **(G)**. ROC curve for classifying resting in Rat 1, with AUC = 0.82. **(H)**. ROC curve for classifying resting in Rat 2, with AUC = 0.86. **I**: ROC curve for classifying other activity in Rat 1, with AUC = 0.47. **(J)**. ROC curve for classifying other activity in Rat 2.
